# Supplementary material for: The integrated stress response promotes B7H6 expression
Source: PubMed Central journal article supplement (PMC6952340; doi:10.1007/s00109-019-01859-w), 2019-12-14
Supplement: 109_2019_1859_MOESM1_ESM.pdf [file 109_2019_1859_MOESM1_ESM.pdf]

**A**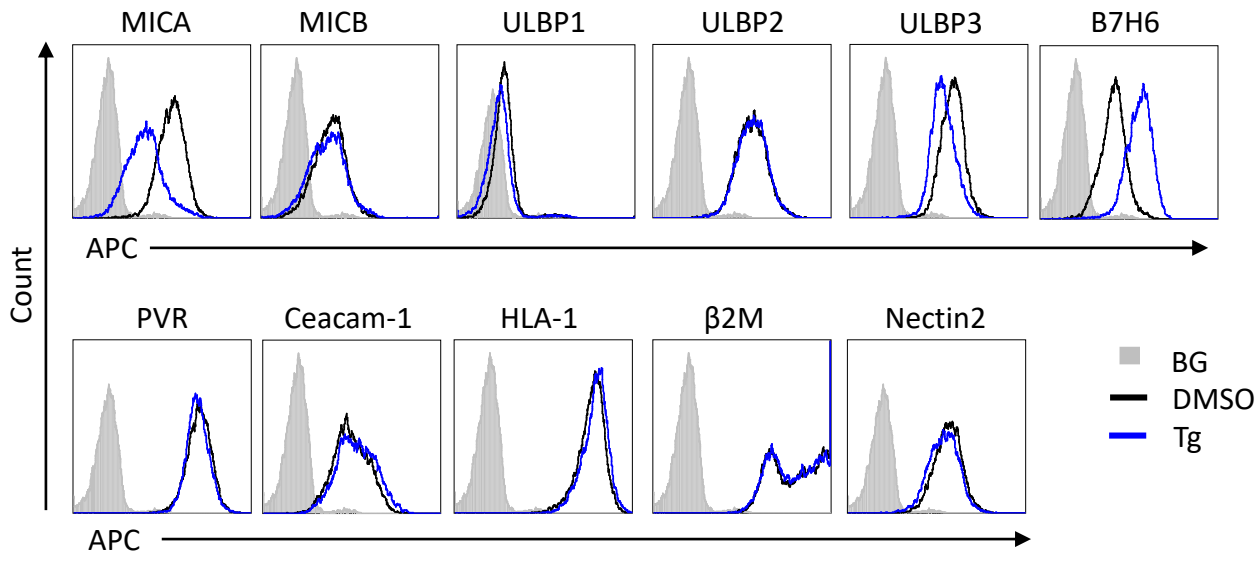

**Fig S1. Effect of ER stress on the expression of NK cells' ligands. (A)** The expression of the indicated natural killer cells ligands was tested by flow cytometry on 624 wt cells treated with 0.125  $\mu$ g/ml Tg or mock treated with DMSO for 16 hours. BG indicates secondary only background staining for both treated and untreated cells (shown in silver is the BG for untreated cells).

A

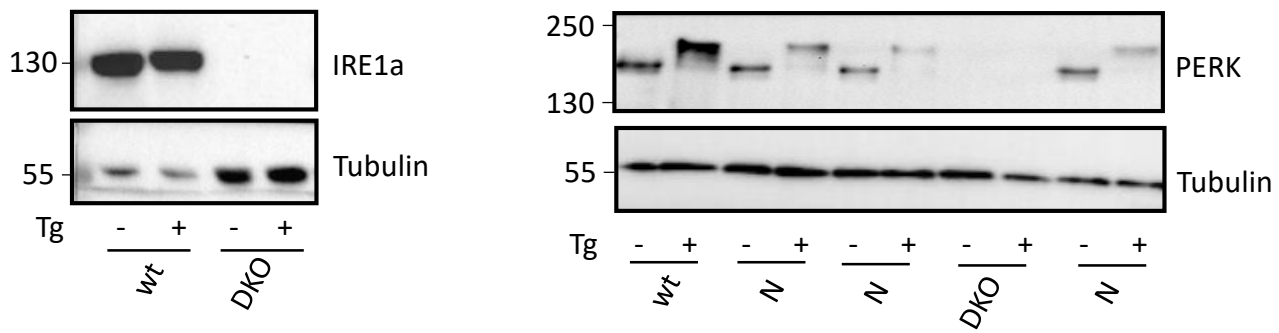

B

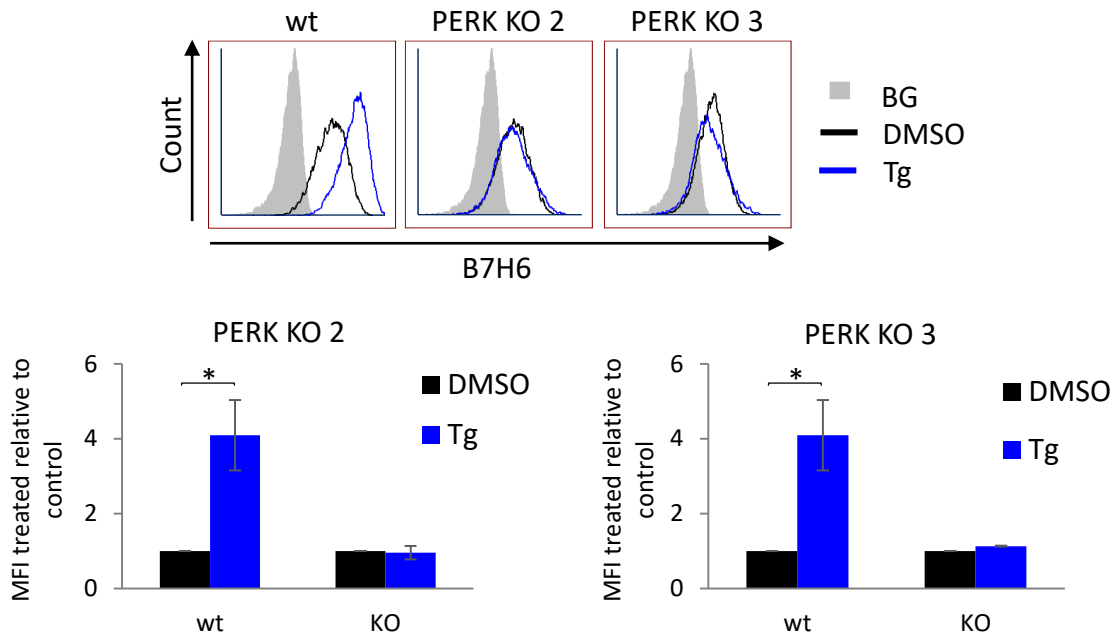

C

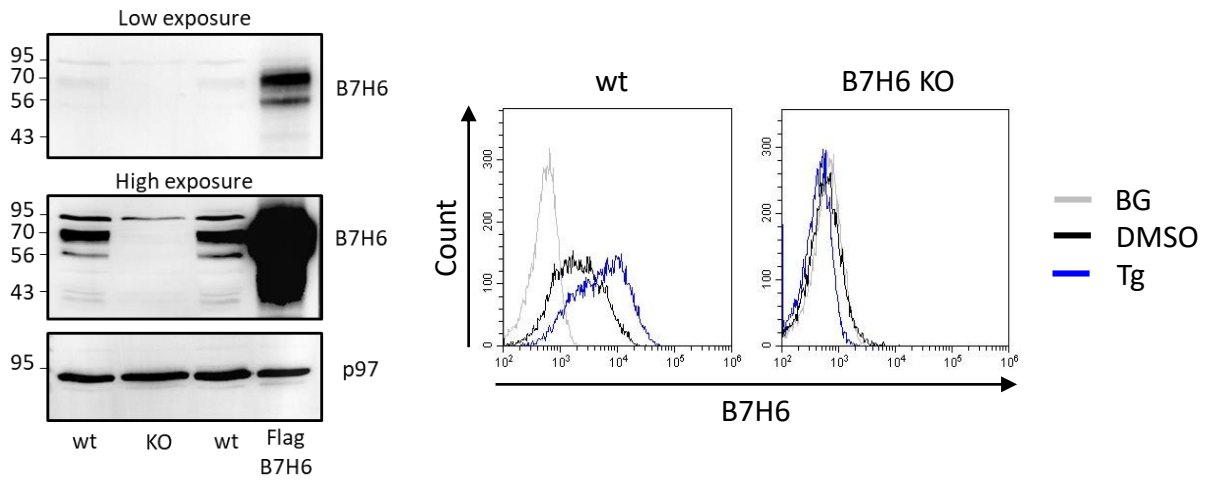

**Fig S2. Generation of 624 knockout cells. (A)** Immunoblotting analysis of IRE1 (left) and PERK (right) protein levels in 624 double knockout (DKO) for both genes after treatment with 0.125  $\mu\text{g}/\text{ml}$  Tg or mock treated with DMSO for 16 hours. Tubulin was used as a loading control. N indicates negative knockout clones. **(B)** Analysis of B7H6 surface levels on another two clones of 624 PERK KO cells after treatment with 0.125  $\mu\text{g}/\text{ml}$  Tg or DMSO for 16 hours compared to wt cells. The charts to the right shows the average mean fluorescence intensity (MFI)  $\pm$  STD of treated relative to untreated cells of three independent experiments. **(C)** Immunoblotting analysis of B7H6 protein levels in 624 wt or B7H6 KO cells, p97 was used as a loading control. The right panel shows B7H6 surface levels as assessed by flow cytometry on those cells after treatment with 0.125  $\mu\text{g}/\text{ml}$  Tg or DMSO for 16 hours. BG indicates secondary only background staining for both treated and untreated cells (shown in silver is the BG for untreated cells).

A

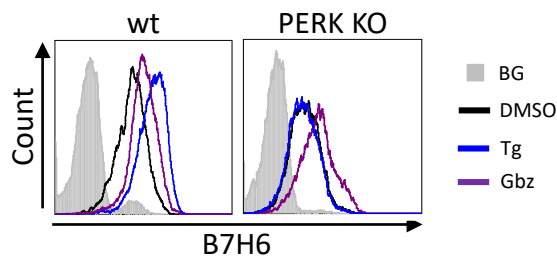

B

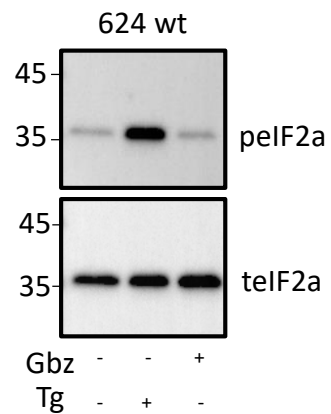

C

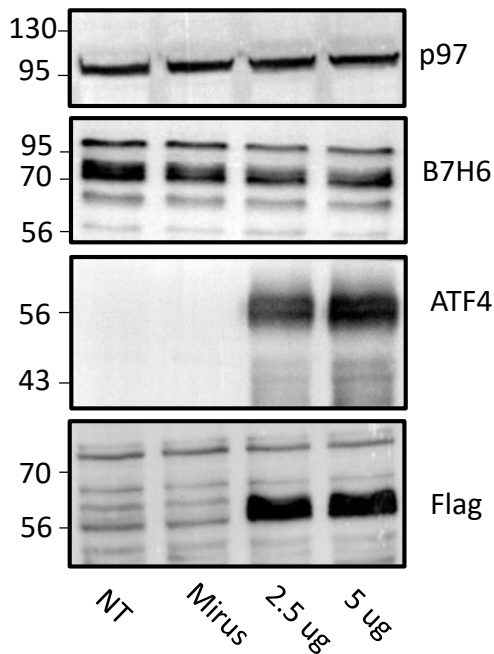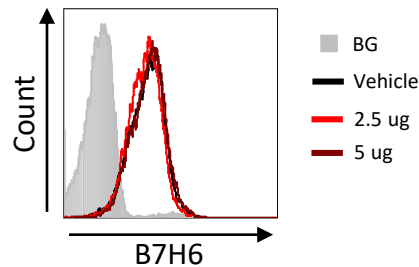

D

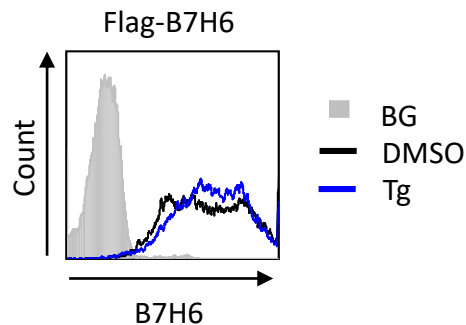

**Figure S3. Guanabenz and ATF4 effects on B7H6 expression.** (A) B7H6 surface levels were evaluated by flow cytometry on 624 wt and PERK KO cells treated with 0.125  $\mu\text{g}/\text{ml}$  Tg or 50  $\mu\text{M}$  guanabenz (Gbz) or mock treated with DMSO for 16 hours. (B) Immunoblotting analysis for pelF2 $\alpha$  and total eIF2 $\alpha$  in the cells in A. (C) Immunoblotting analysis of B7H6, ATF4 and Flag tag levels in 624 wt cells transfected with 2.5 or 5  $\mu\text{g}$  of Flag-ATF4. p97 was used as a loading control. To the right appears B7H6 surface levels evaluated by flow cytometry on the transfected cells. (D) 624 wt stably expressing Flag-B7H6 were treated with 0.125  $\mu\text{g}/\text{ml}$  Tg or mock treated with DMSO for 16 hours. Then, they were evaluated for B7H6 expression by flow cytometry. BG indicates secondary only background staining for both treated and untreated cells (shown is the BG for untreated cells).

A

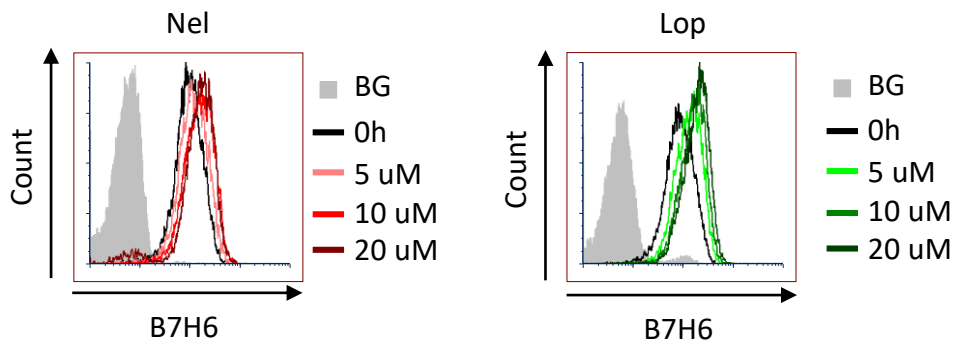

B

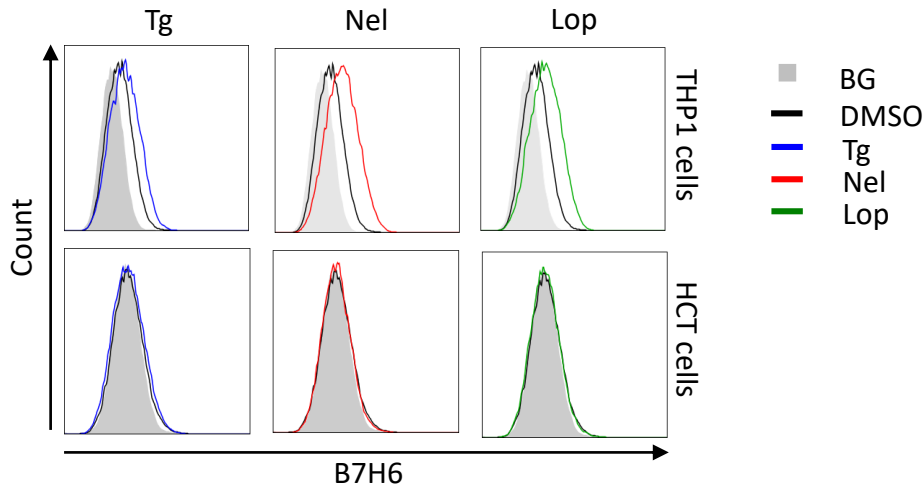

**Figure S4. Nelfinavir and lopinavir dose response and their effect on THP1 or HCT cell lines. (A)** 624 wt cells were treated with the indicated concentrations of each drug for 16 hours or mock treated with DMSO. Then, B7H6 surface levels were evaluated by flow cytometry. **(B)** B7H6 surface level were evaluated by flow cytometry on THP1 or HCT cells after treatment with 0.125  $\mu\text{g}/\text{ml}$  Tg, 10  $\mu\text{M}$  Nel or 20  $\mu\text{M}$  Lop or mock treated with DMSO for 16 hours. BG indicates secondary only background staining, which was similar for both treated and untreated cells (shown is the BG for untreated cells).
